# Supplementary material for: Automatic high-pressure hydrogen generation from formic acid in the presence of nano-Pd heterogeneous catalysts at mild temperatures
Source: Royal Society of Chemistry journal article supplement (doi:10.1039/c7se00131b), 2017-01-01
Supplement: c7se00131b1.pdf [file c7se00131b1.pdf]

## Electronic Supplementary Information

# Automatic high-pressure hydrogen generation from formic acid in the presence of nano-Pd heterogeneous catalysts at mild temperatures

Heng Zhong,<sup>a</sup> Masayuki Iguchi,<sup>a</sup> Fu-Zhan Song,<sup>b</sup> Maya Chatterjee,<sup>a</sup> Takayuki Ishizaka,<sup>a</sup>  
Ikuhiro Nagao,<sup>a</sup> Qiang Xu,<sup>b</sup> Hajime Kawanami<sup>a\*</sup>

*<sup>a</sup>Research Institute for Chemical Process Technology, National Institute of Advanced  
Industrial Science and Technology, 4-2-1 Nigatake, Miyagino-ku, Sendai 983-8551,  
Japan*

*<sup>b</sup>Research Institute of Electrochemical Energy, National Institute of Advanced  
Industrial Science and Technology, 1-8-31, Midorigaoka, Ikeda, Osaka 563-8577,  
Japan*

**\*Corresponding Author:** Hajime Kawanami

Tel/Fax: +81-22-2372097

E-mail: h-kawanami@aist.go.jp

## Chemicals

Graphite (C, 99.8%, Alfa Aesar), potassium permanganate ( $\text{KMnO}_4$ , 99.3%, Wako Pure Chemical Industries, Ltd.), sulfuric acid ( $\text{H}_2\text{SO}_4$ , 95%, Wako Pure Chemical Industries, Ltd.), phosphoric acid ( $\text{H}_3\text{PO}_4$ , 85%, Wako Pure Chemical Industries, Ltd.), hydrogen peroxide ( $\text{H}_2\text{O}_2$ , 30%, Wako Pure Chemical Industries, Ltd.), *p*-phenylenediamine (PDA,  $\text{C}_6\text{H}_8\text{N}_2$ , 97%, Wako Pure Chemical Industries, Ltd.), sodium borohydride ( $\text{NaBH}_4$ , 92%, Nacalai Tesque, Inc.), potassium tetrachloropalladate ( $\text{K}_2\text{PdCl}_4$ , 95%, Wako Pure Chemical Industries, Ltd.), hydrogen tetrachloroaurate(III) tetrahydrate ( $\text{HAuCl}_4 \cdot 4\text{H}_2\text{O}$ , 99%, Wako Pure Chemical Industries, Ltd.), formic acid (FA,  $\text{HCOOH}$ , 98%, Wako Pure Chemical Industries, Ltd.), sodium formate (SF,  $\text{HCOONa}$ , 98%, Wako Pure Chemical Industries, Ltd.), hydrochloric acid ( $\text{HCl}$ , 35%, Wako Pure Chemical Industries, Ltd.), nitric acid ( $\text{HNO}_3$ , 69%, Wako Pure Chemical Industries, Ltd.), ethanol ( $\text{C}_2\text{H}_5\text{OH}$ , 95%, Wako Pure Chemical Industries, Ltd.), acetone ( $\text{C}_3\text{H}_6\text{O}$ , 99%, Nacalai Tesque, Inc.) were all commercial reagents and were used as received.

## Pd/PDA-rGO synthesis

A mixture of 180 mL concentrated  $\text{H}_2\text{SO}_4$  and 20 mL concentrated  $\text{H}_3\text{PO}_4$  was gradually added into a beaker containing 1.5 g graphite and 9 g  $\text{KMnO}_4$ , which was placed in an ice bath to prevent overheating. Then the beaker was placed in a water bath at 323 K under magnetic stir. After 12 hours, the solution was poured into another beaker containing 200 g ice and 1.5 mL  $\text{H}_2\text{O}_2$  (30%). Then, the solid precipitate (graphene oxide, GO) was obtained by centrifugation, washing with water (100 mL),  $\text{HCl}$  (30%, 100 mL) and ethanol (100 mL) for two times and drying in vacuum oven at room temperature for over 72 h. Then, 0.5 g dried GO after grinding to powders was dispersed in 500 mL de-

ionized water under sonication. After 2.5 hours, 40 mL acetone containing 2.7 g *p*-phenylenediamine (PDA) was gradually added into the GO dispersed water solution and stirred for 48 hours to prepare the PDA-GO. The resultant PDA-GO was separated by centrifugation, washing with water and acetone, and dried in vacuum oven at room temperature for over 48 h. Then the obtained PDA-GO was dispersed in 250 mL deionized water, and an aqueous solution of  $K_2PdCl_4$  (0.9 mmol) was added into the PDA-GO solution under sonication. After being sonicated for 30 min, 5 mL deionized water solution containing 0.3 g  $NaBH_4$  was added and the mixture was stirred for 45 min, resulting the formation of Pd/PDA-rGO catalyst. Finally, the Pd/PDA-rGO catalyst was obtained by centrifugation, washing with deionized water and drying in vacuum oven at room temperature for over 48 hours.

### **PdAu/PDA-rGO synthesis**

The process of synthesizing the PdAu/PDA-rGO was almost the same as the process of synthesizing the Pd/PDA-rGO. The only difference is that the same molar amount of  $HAuCl_4 \cdot 4H_2O$  and  $K_2PdCl_4$  were dissolved in deionized water together and co-precipitated simultaneously on the PDA-rGO.

### **Instrumentation**

X-ray diffraction (XRD) patterns of the catalyst before and after reactions were collected by a Rigaku Smartlab X-ray diffractometer (Cu-K $\alpha$  source, 40 kV, 30 mA). SEM and TEM images of the catalyst were obtained with a scanning electron microscopy (SEM, Hitachi S-4800) operating at 15 kV and a transmission electron microscopy (TEM, Tecnai G<sup>2</sup> 20) operating at 200 kV, respectively. Pd loading of the Pd/PDA-rGO catalyst

was determined by inductively coupled plasma atomic emission spectroscopy (ICP-AES, SPS-3100, SII Nano Technology Inc.). A Horiba FT-720 Fourier transform infrared spectrometer (FR/IR) was used to measure the IR spectra of the solid samples. Gas samples after formic acid decomposition reactions were analyzed by a Shimadzu GC-8A gas chromatograph analyzer equipped with one molecular sieve column and one Porapak Q column using argon (Ar) as the carrier gas. Formic acid concentration in the reaction solution was measured by a Shimadzu Nexera X2 HPLC system with a UV detector at 210 nm equipped with an ion exclusion column (KC-811, Showa Denko K.K.) with 10 mmol/L phosphoric acid aqueous solution as an eluent. The BET surface area of the catalyst were measured with a N<sub>2</sub> adsorption/desorption method at liquid nitrogen temperature (77 K) by a Belsorp-mini apparatus (MicrotracBEL Corp., Japan) after dehydration under vacuum at 120 °C for 4 h.

**Table S1.** BET surface areas of the Pd/PDA-rGO catalyst before and after the FA decomposition reaction.

|        | $S_{\text{BET}}$ (m <sup>2</sup> /g) |
|--------|--------------------------------------|
| Before | 11                                   |
| After  | 20                                   |

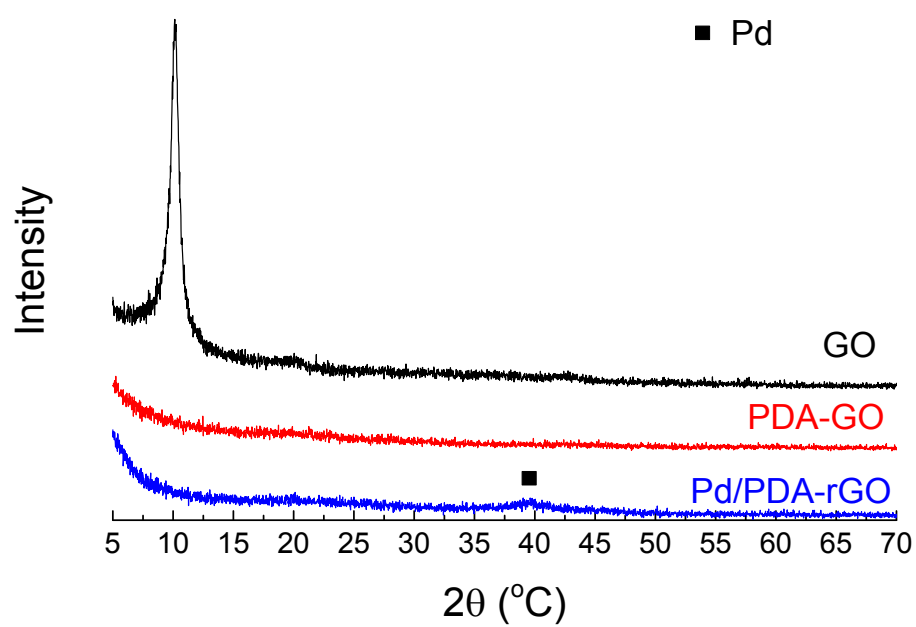

**Figure S1.** X-ray diffraction spectra of GO, PDA-GO and Pd/PDA-rGO.

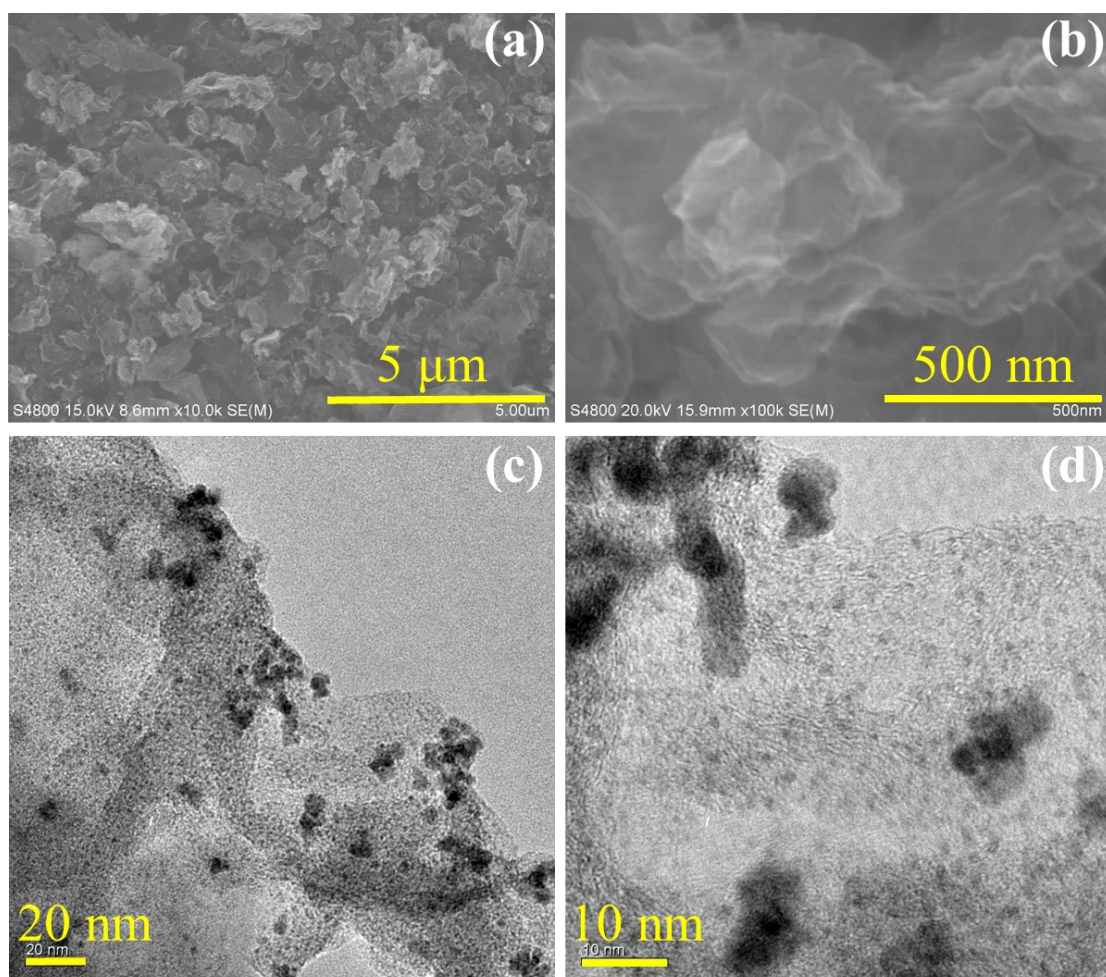

**Figure S2.** SEM ((a) and (b)) and TEM ((c) and (d)) images of the Pd/PDA-rGO catalyst.

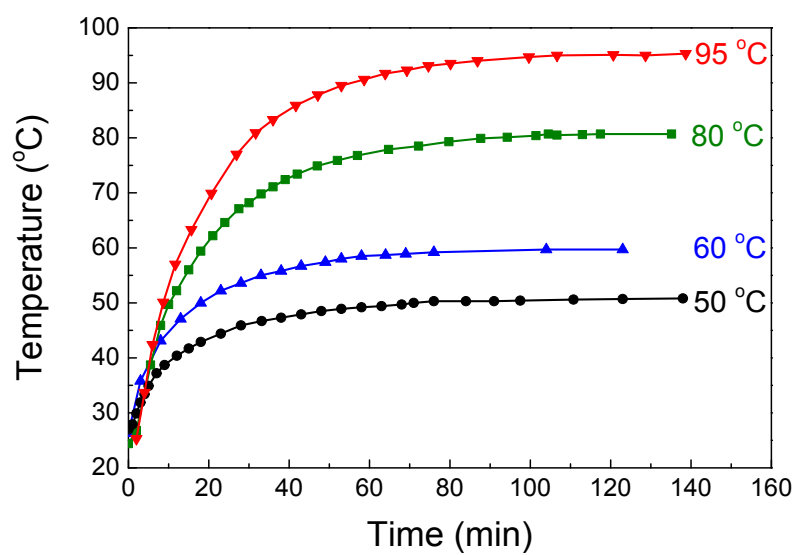

**Figure S3.** Actual temperature in the tubular reactor as functions of time (tested by using the de-ionized water as the intermediate).

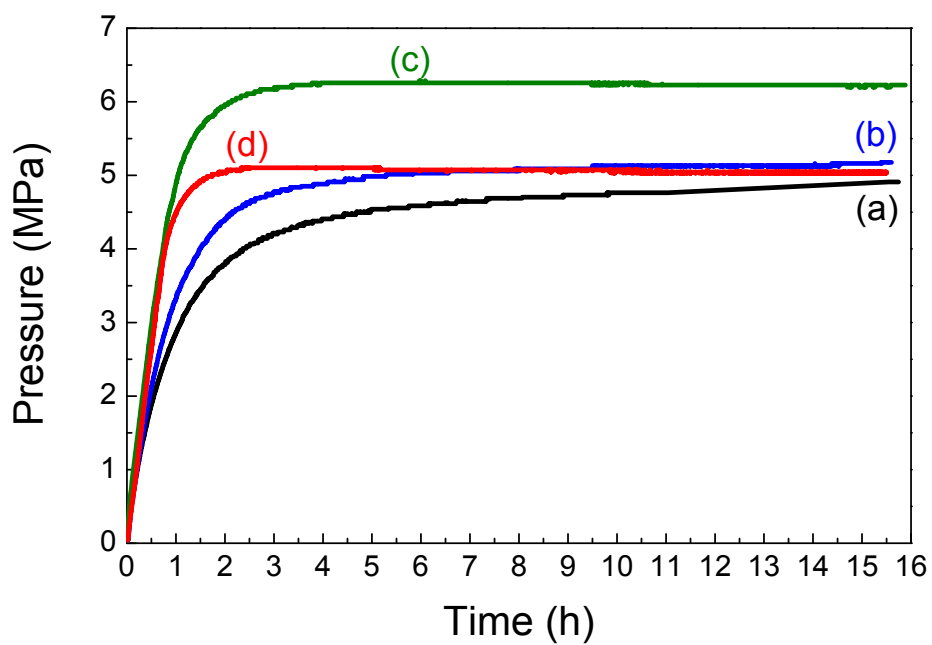

**Figure S4.** Variation of gas pressure with time at (a) 50, (b) 60, (c) 80, and (d) 95 °C (solution: 6.7 mol/L formic acid + 6.7 mol/L sodium formate; liquid volume: 6 mL; catalyst: 10 mg).

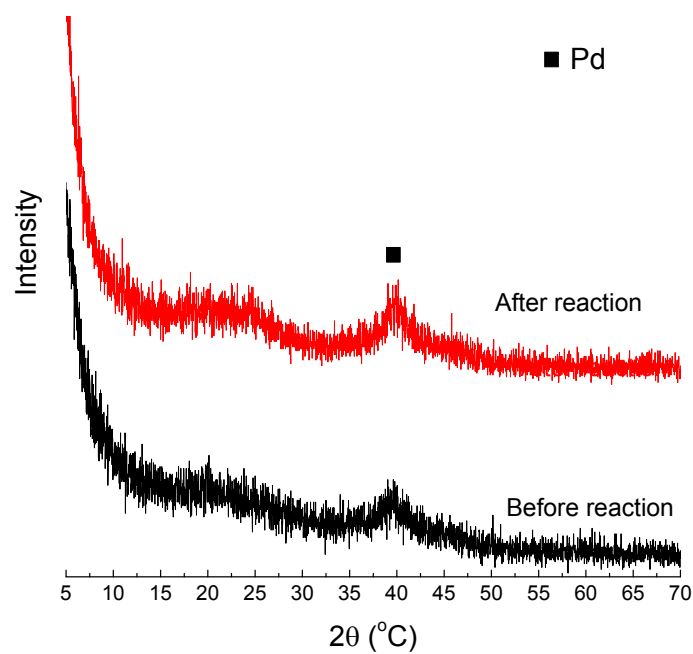

**Figure S5.** X-ray diffraction spectra of the Pd/PDA-rGO catalyst before and after reaction (solution: 6.7 mol/L formic acid + 6.7 mol/L sodium formate; liquid volume: 6 mL; catalyst: 10 mg; temperature: 80  $^{\circ}\text{C}$ ; time: 4 h).

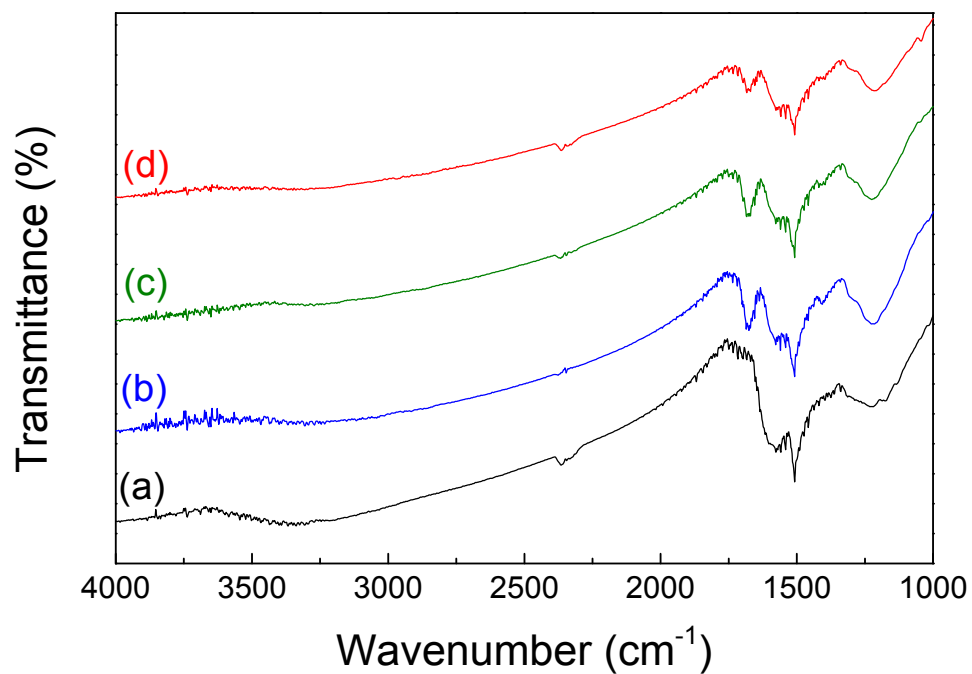

**Figure S6.** FT-IR spectra of the Pd/PDA-rGO (a) before the reaction and after reactions at (b) 50, (c) 60, and (d) 80 °C, respectively (solution: 6.7 mol/L formic acid + 6.7mol/L sodium formate; liquid volume: 6 mL; time: 15 h).

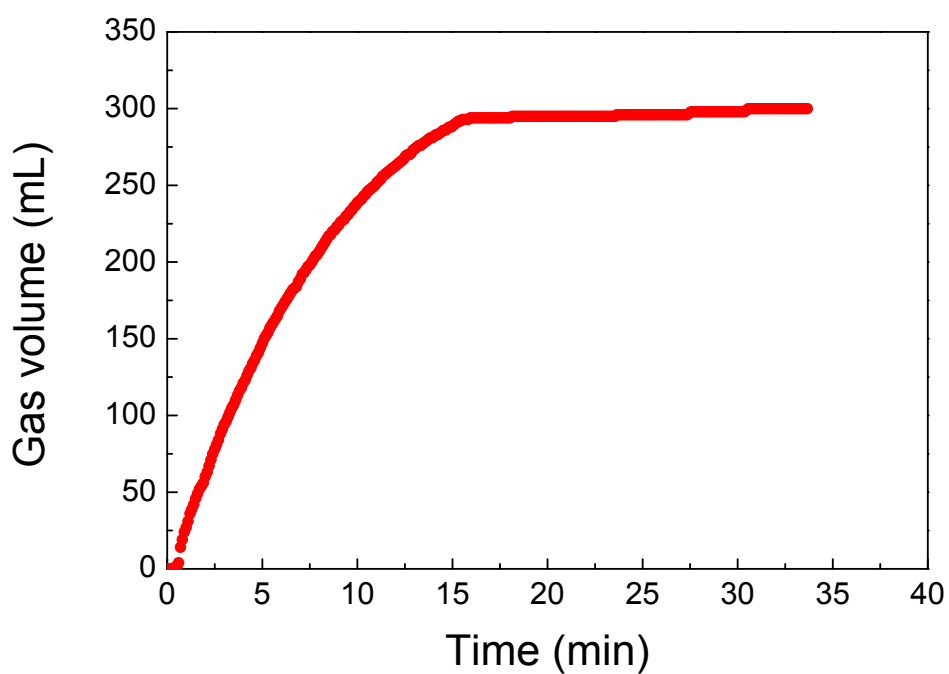

**Figure S7.** Gas volume as a function of time generated from the decomposition of formic acid at un-pressurized condition (atmospheric pressure) (solution: 2.2mol/L formic acid + 2.2mol/L sodium formate; liquid volume: 3 mL; catalyst: 20 mg; temperature: 80°C).

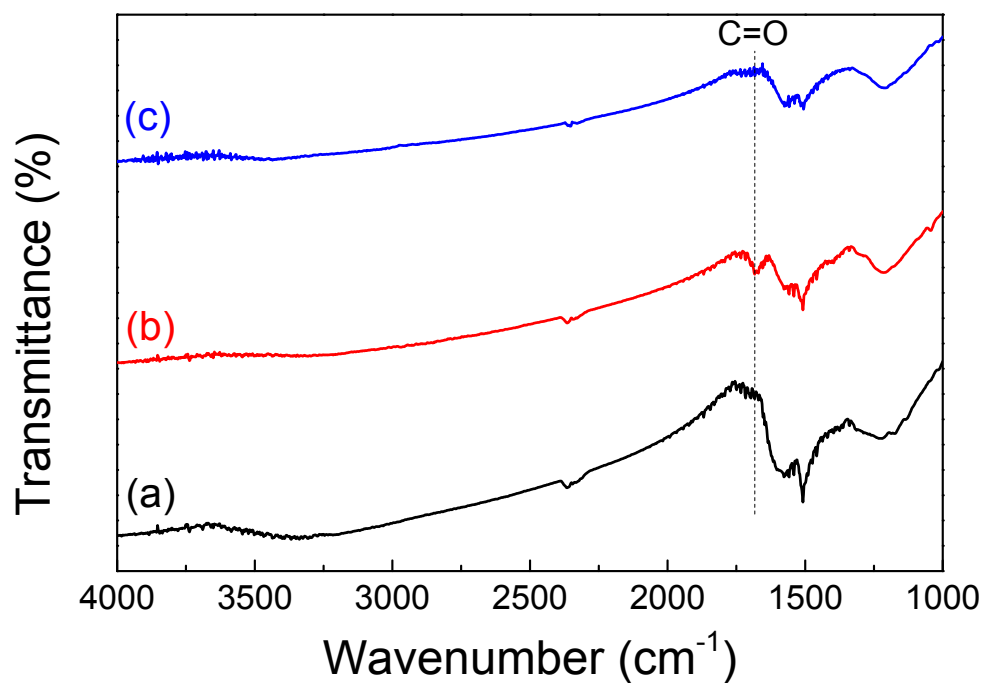

**Figure S8.** FT-IR spectra of the (a) catalyst before the reaction, (b) catalyst after the reaction, and (c) used catalyst after re-activation in 1 mol/L NaOH solution at 60 °C for 2 h.

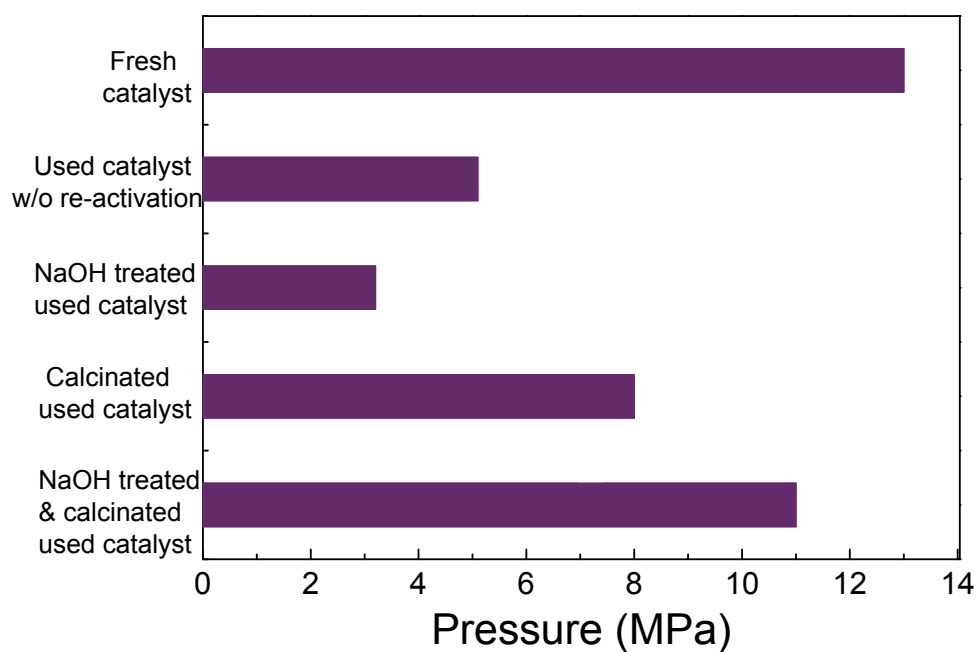

**Figure S9.** Effect of the catalyst re-activation method on the gas pressure obtained from the formic acid decomposition (reaction conditions: solution, 2 mol/L FA + 2 mol/L SF; liquid, 6 mL; temperature, 80 °C; time, 4 h; catalyst, 20 mg).

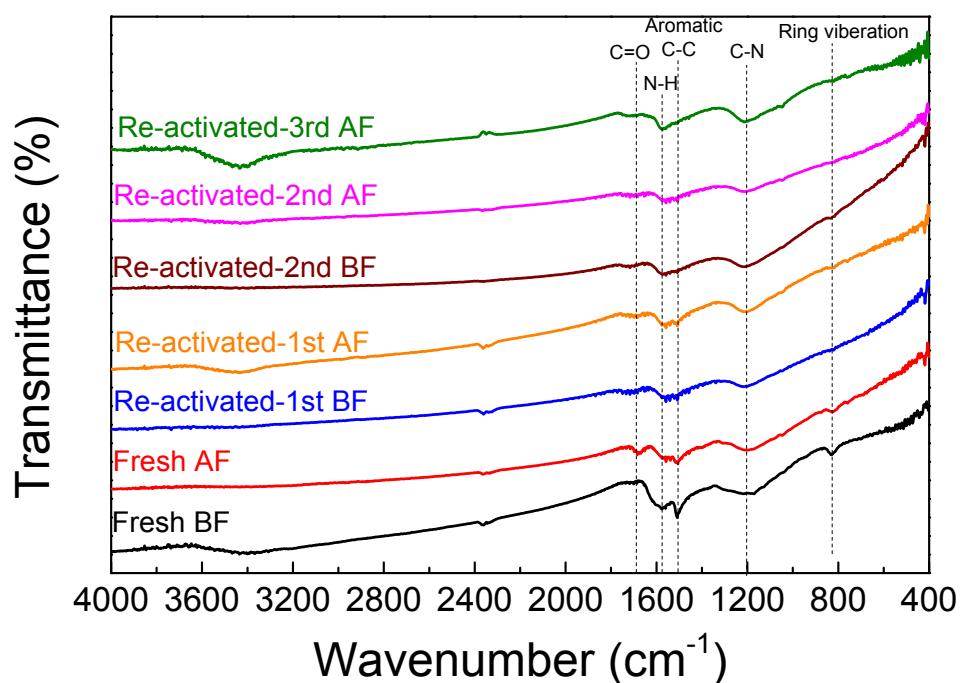

**Figure S10.** FT-IR spectra of the fresh and cyclically re-activated Pd/PDA-rGO catalyst before and after the FA decomposition reaction (BF: before reaction; AF: after reaction; reaction conditions: solution, 2mol/L formic acid + 2mol/L sodium formate; liquid volume, 6 mL; catalyst, 20 mg; temperature, 80 °C; time, 4 h).

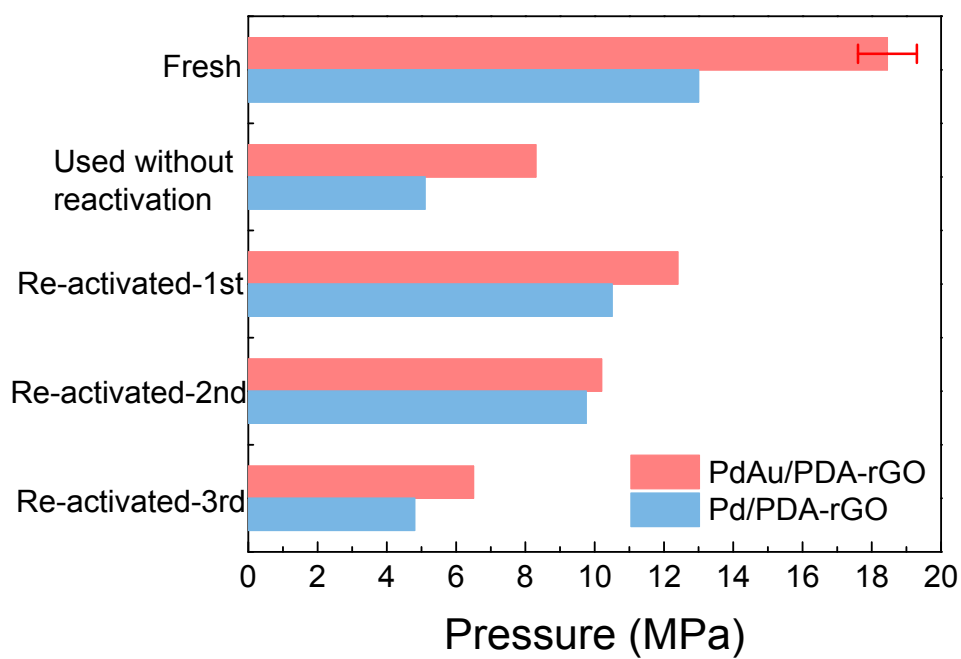

**Figure S11.** Comparison of the gas pressure obtained with fresh and re-activated Pd/PDA-rGO and PdAu/PDA-rGO catalysts (solution, 2mol/L formic acid + 2mol/L sodium formate; liquid volume, 6 mL; catalyst, 20 mg; temperature, 80 °C; time, 4 h)
